# Supplementary material for: The Contribution of Psychological Factors to Inter-Individual Variability in Conditioned Pain Modulation Is Limited in Young Healthy Subjects
Source: MDPI journal article supplement (doi:10.3390/brainsci12050623), 2022-05-10
Supplement: s1 [file s1]

## Supplementary Materials

**Table S1.** Cross-sectional analysis including interactions between psychological factors and CPM paradigm (linear regression, Model 4,  $n = 126$ ) for psychological factor interaction with paradigm. Model 4: multiple  $R^2 = 4.6\%$ ,  $p = 0.845$ . Interaction effects between BDI, STAI Trait, or PCS and paradigm are signified with '\*'. Sex and paradigms compared to a reference (male and 30 s heat/60 s cold, respectively). Paradigm 1 = heat 60 s/cold 90 s, Paradigm 2 = electrical/cold120s.  $CS_{Temp}$  = conditioning stimulus temperature in °C, BDI = Beck's Depression Inventory score, STAI Trait = State Trait Anxiety Inventory score (trait subscale), PCS = Pain Catastrophizing Scale score.

| Model   | Predictor             | Estimate | p-Value |
|---------|-----------------------|----------|---------|
| Model 4 | $CS_{Temp}$           | 1.15     | 0.167   |
|         | Age                   | -0.15    | 0.694   |
|         | Sex                   | 1.31     | 0.826   |
|         | BDI                   | -0.05    | 0.961   |
|         | PCS                   | -0.53    | 0.190   |
|         | STAI Trait            | -0.35    | 0.485   |
|         | Paradigm 1            | -5.73    | 0.862   |
|         | Paradigm 2            | -27.2    | 0.351   |
|         | BDI*Paradigm 1        | 0.51     | 0.827   |
|         | BDI*Paradigm 2        | -0.10    | 0.975   |
|         | STAI Trait*Paradigm 1 | 0.03     | 0.978   |
|         | STAI Trait*Paradigm 2 | 0.70     | 0.444   |
|         | PCS*Paradigm 1        | 0.41     | 0.545   |
|         | PCS*Paradigm 2        | 0.54     | 0.498   |

**Table S2.** Repeated measures analysis including interactions between psychological factors and CPM paradigm (mixed model analysis, Model 5, 52 participations, 118 observations). REML criteria at convergence = 1006.3. Interaction effects between psychological factors and paradigm are signified with '\*'. Sex and paradigm compared to a reference (male and electrical/120 s cold, respectively).  $CS_{Temp}$  = conditioning stimulus temperature in °C, BDI = Beck's Depression Inventory score, STAI Trait = State-Trait Anxiety Inventory score (trait subscale), PCS = Pain Catastrophizing Scale score. Significant effects are marked in bold.

| Model   | Predictor                     | Estimate    | p-Value      |
|---------|-------------------------------|-------------|--------------|
| model 5 | <b><math>CS_{Temp}</math></b> | <b>1.56</b> | <b>0.002</b> |
|         | Age                           | 0.29        | 0.541        |
|         | Sex                           | -4.30       | 0.445        |
|         | BDI                           | 2.76        | 0.686        |
|         | PCS                           | -0.16       | 0.943        |
|         | STAI Trait                    | -0.31       | 0.634        |
|         | Paradigm                      | -7.26       | 0.198        |
|         | Repeat                        | -2.95       | 0.209        |
|         | BDI*Paradigm                  | -3.76       | 0.130        |
|         | STAI                          | 0.22        | 0.795        |
|         | Trait*Paradigm                |             |              |
|         | PCS*Paradigm                  | 0.24        | 0.709        |

**Table S3.** Significance and variance explained by fixed effects in Models 6 and 7 ( $n = 52, 118$  observations). Interaction effects are denoted by '\*'. Model 6  $R^2$ : 10.0%, Model 7  $R^2$ : 13.6%.  $p$ -values signify the significance of the predictor, not the significance of explained variance. Please note that the combined variances of Models 6 or 7 differ from the combined fixed effects variances of Models 3 and 5, respectively, due to different model types (linear vs. mixed) and different algorithms used in variance decomposition.  $CS_{Temp}$  = conditioning stimulus temperature in °C, BDI = Beck's Depression Inventory score, STAI Trait = State-Trait Anxiety Inventory score (trait subscale), PCS = Pain Catastrophizing Scale score.

| Predictor           | Model 6            |             | Model 7            |            |
|---------------------|--------------------|-------------|--------------------|------------|
|                     | Variance Explained | $p$ -Values | Variance Explained | $p$ -Value |
| $CS_{Temp}$         | 4.55%              | 0.024       | 4.50%              | 0.022      |
| Age                 | 0.06%              | 0.659       | 0.06%              | 0.494      |
| Sex                 | 0.01%              | 0.903       | 0.02%              | 0.523      |
| BDI                 | 0.08%              | 0.584       | 0.08%              | 0.116      |
| STAI Trait          | 0.09%              | 0.920       | 0.09%              | 0.413      |
| PCS                 | <0.01%             | 0.983       | <0.01%             | 0.626      |
| Paradigm            | 2.07%              | 0.151       | 2.11%              | 0.728      |
| Repeat              | 0.09%              | 0.212       | 0.10%              | 0.242      |
| BDI*Paradigm        | n/a                | n/a         | 2.95%              | 0.053      |
| PCS*Paradigm        | n/a                | n/a         | 0.02%              | 0.561      |
| STAI Trait*Paradigm | n/a                | n/a         | 0.04%              | 0.708      |

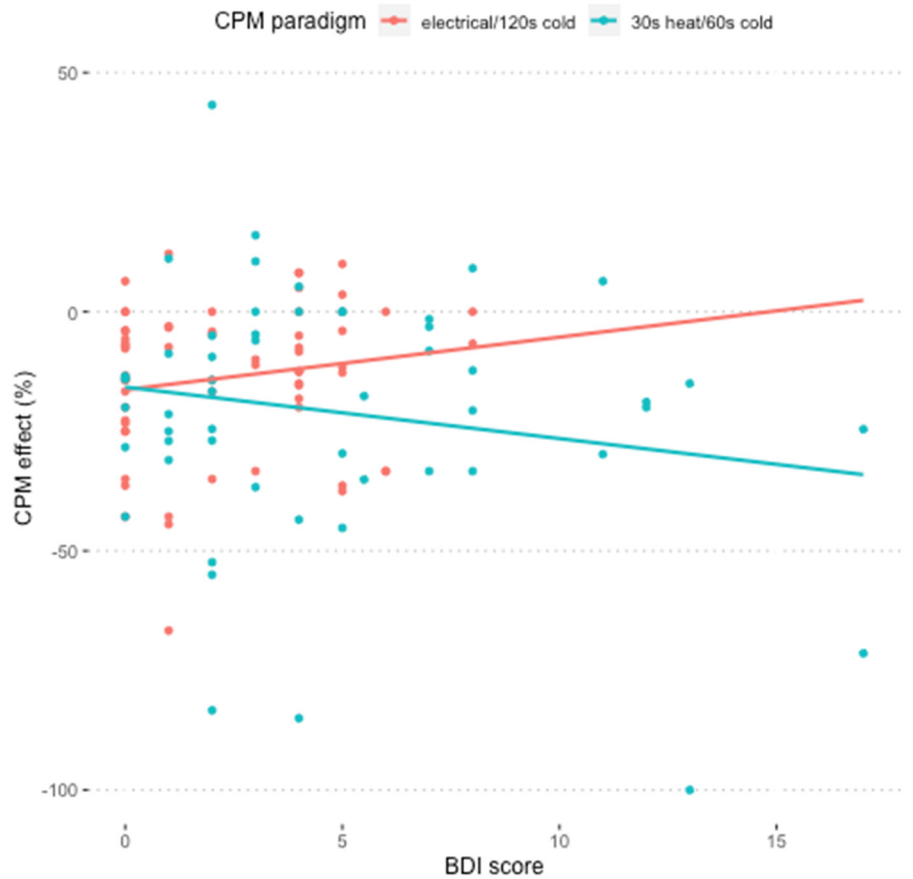

**Figure S1.** Interaction plot of the effect of BDI scores on CPM magnitude in CPM paradigms using electrical and heat stimulation as test stimuli, respectively.

A more negative CPM effect denotes a larger pain reduction. The correlation between BDI score and CPM effects was: 0.16 and  $-0.18$  for electrical and heat paradigms, respectively.
